# Supplementary material for: Distinct Genomic Integration of MLV and SIV Vectors in Primate Hematopoietic Stem and Progenitor Cells
Source: PLoS Biol. 2004 Nov 23;2(12):e423. doi: 10.1371/journal.pbio.0020423 (PMC529319; doi:10.1371/journal.pbio.0020423)
Supplement: Table S2 — (18 KB PDF). [file pbio.0020423.st002.pdf]

|             | # hits | Chr. | Gene size (bps) | Gene Symbol | Gene ID | Gene Name                                                                 |
|-------------|--------|------|-----------------|-------------|---------|---------------------------------------------------------------------------|
| SIV         | 2      | 1    | 155,979         | MACF1       | 23499   | microtubule-actin crosslinking factor 1                                   |
|             | 3      | 1    | 114,312         | EYA3        | 2140    | eyes absent homolog 3                                                     |
|             | 2      | 1    | 92,591          | SHARP       | 23013   | SMART/HDAC1 associated repressor protein                                  |
|             | 2      | 2    | 168,390         | TLK1        | 9874    | tousled-like kinase 1                                                     |
|             | 2      | 3    | 55,957          | SACM1L      | 22908   | SAC1 suppressor of actin mutations 1-like (yeast)                         |
|             | 2      | 3    | 103,954         | PIK3CB      | 5291    | phosphoinositide-3-kinase, catalytic, beta polypeptide                    |
|             | 2      | 6    | 53,577          | STK38       | 11329   | serine/threonine kinase 38                                                |
|             | 2      | 9    | 207,638         | VPS13A      | 23230   | vacuolar protein sorting 13A                                              |
|             | 3      | 11   | 152,699         | ARHGEF12    | 23365   | Rho guanine nucleotide exchange factor 12                                 |
|             | 2      | 16   | 50,434          | ITGAL       | 3683    | integrin, alpha L                                                         |
|             | 2      | 16   | 141,462         | NFATC3      | 4775    | nuclear factor of activated T-cells, cytoplasmic, calcineurin-dependent 3 |
|             | 2      | 17   | 73,088          | PRPSAP2     | 5636    | phosphoribosyl pyrophosphate synthetase-associated protein 2              |
|             | 2      | 17   | 32,431          | 182-FIP     | 57532   | 82-kD FMRP interacting protein                                            |
|             | 3      | 17   | 296,747         | SCAP1       | 8631    | src family associated phosphoprotein 1                                    |
|             | 2      | 17   | 83,060          | APPBP2      | 10513   | amyloid beta precursor protein binding protein 2                          |
|             | 2      | 17   | 30,067          | PCNT1       | 79902   | pericentrin 1                                                             |
|             | 2      | 20   | 27,021          | C20orf140   | 128637  | chromosome 20 open reading frame 140                                      |
|             | 2      | 22   | 226,355         | MKL1        | 57591   | megakaryoblastic leukemia 1                                               |
| MLV         | 2      | 1    | 46,142          | FLJ32112    | 127428  | hypothetical protein FLJ32112                                             |
|             | 2      | 2    | 80,791          | LPIN1       | 23175   | lipin 1                                                                   |
|             | 2      | 2    | 45,728          | CASP10      | 843     | caspase 10                                                                |
|             | 2      | 3    | 136,110         | TRAD        | 11139   | serine/threonine kinase with Dbl- and pleckstrin homology domains         |
|             | 7      | 3    | 514,588         | MDS1        | 4197    | myelodysplasia syndrome 1                                                 |
|             | 3      | 8    | 186,230         | RBPM5       | 11030   | RNA binding protein with multiple splicing                                |
|             | 2      | 14   | 699,786         | IGH         | 3492    | immunoglobulin heavy locus                                                |
|             | 2      | 16   | 23,900          | LOC57149    | 57149   | hypothetical protein A-211C6.1                                            |
|             | 2      | 17   | 180,525         | MSF         | 10801   | MLL septin-like fusion                                                    |
|             | 2      | 18   | 140,154         | C18orf17    | 125488  | hypothetical protein FLJ33761                                             |
|             | 2      | 18   | 88,720          | PSTPIP2     | 9050    | proline-serine-threonine phosphatase interacting protein 2                |
| MLV and SIV | 2      | 20   | 67,976          | RRBP1       | 6238    | ribosome binding protein 1 homolog                                        |
|             | 2      | 4    | 59,726          | MMRN        | 22915   | multimerin                                                                |
|             | 2      | 4    | 402,638         | INPP4B      | 8821    | inositol polyphosphate-4-phosphatase                                      |
|             | 2      | 6    | 462,343         | ATXN1       | 6310    | spinocerebellar ataxia 1                                                  |
|             | 2      | 9    | 40,094          | TRAF2       | 7186    | TNF receptor-associated factor 2                                          |
|             | 5      | 11   | 174,389         | PACS1       | 55690   | phosphofurin acidic cluster sorting protein 1                             |
|             | 2      | 12   | 141,808         | HMG2        | 8091    | high mobility group AT-hook 2                                             |
|             | 2      | 14   | 678,633         | RAD51L1     | 5890    | RAD51-like 1                                                              |
|             | 3      | 17   | 87,576          | GRB2        | 2885    | growth factor receptor-bound protein 2                                    |
|             | 2      | 19   | 15,395          | ZNF432      | 9668    | zinc finger protein 432                                                   |
|             | 3      | 21   | 261,536         | RUNX1       | 861     | runt-related transcription factor 1                                       |

**Table S2.** List of RefSeq genes targeted more than once by SIV, MLV or both retroviral vectors. The number of hits within each transcription unit is listed in the first column and the chromosomal location in the second column.
